# Supplementary material
Source: HighWire-hosted journal article supplement (https://bmjopen.bmj.com/content/12/6/e059172)
Supplement: inline-supplementary-material-2 [file inline-supplementary-material-2.pdf]

## Appendix 2

*Characteristics of patients with three negative index tests, including the sample of patients receiving a 12 lead ECG versus the patients outside the sample, not receiving an ECG.*

| Characteristic             | Patients with three negative index tests <sup>a</sup> |                               |                    | p-value |
|----------------------------|-------------------------------------------------------|-------------------------------|--------------------|---------|
|                            | Total<br>(n=3813)                                     | ECG (random<br>sample, n=308) | No ECG<br>(n=3505) |         |
| Female, n (%)              | 2088 (54.8)                                           | 168 (54.5)                    | 1920 (54.8)        | 0.937   |
| Age in years, M (SD)       | 73.4 (5.4)                                            | 73.1 (5.3)                    | 73.4 (5.5)         | 0.274   |
| Ethnic origin <sup>b</sup> |                                                       |                               |                    | 0.495   |
| White, n (%)               | 3360 (96.0)                                           | 293 (95.1)                    | 3367 (96.2)        |         |
| Black, n (%)               | 67 (1.8)                                              | 8 (2.6)                       | 59 (1.7)           |         |
| Other, n (%) <sup>c</sup>  | 81 (2.1)                                              | 7 (2.3)                       | 74 (2.1)           |         |
| History <sup>d</sup>       |                                                       |                               |                    |         |
| Hypertension, n (%)        | 1932 (50.7)                                           | 135 (44.0)                    | 1797 (51.4)        | 0.013   |
| Stroke/TIA, n (%)          | 292 (7.7)                                             | 17 (5.5)                      | 275 (7.9)          | 0.143   |
| Diabetes, n (%)            | 673 (17.7)                                            | 44 (14.3)                     | 629 (18.0)         | 0.109   |
| Heart failure, n (%)       | 62 (1.6)                                              | 5 (1.6)                       | 57 (1.6)           | 1.000   |
| Thromboembolism, n (%)     | 181 (4.7)                                             | 9 (2.9)                       | 172 (4.9)          | 0.117   |
| Vascular disease, n (%)    | 542 (14.2)                                            | 39 (12.7)                     | 503 (14.4)         | 0.422   |
| Symptoms <sup>e</sup>      |                                                       |                               |                    |         |
| Palpitations, n (%)        | 633 (16.6)                                            | 51 (16.6)                     | 582 (16.6)         | 0.976   |
| Vertigo, n (%)             | 794 (20.8)                                            | 63 (20.5)                     | 731 (20.9)         | 0.862   |
| Syncope, n (%)             | 139 (3.6)                                             | 10 (3.2)                      | 129 (3.7)          | 0.695   |
| Dyspnea, n (%)             | 767 (20.1)                                            | 70 (22.7)                     | 697 (19.9)         | 0.235   |
| Chest tightness, n (%)     | 362 (9.5)                                             | 20 (6.5)                      | 342 (9.8)          | 0.061   |

|                                                |              |              |              |                    |
|------------------------------------------------|--------------|--------------|--------------|--------------------|
| Exercise intolerance, n (%)                    | 809 (21.2)   | 62 (20.1)    | 747 (21.3)   | 0.604              |
| Any of the above, n (%)                        | 1912 (50.1)  | 148 (48.1)   | 1764 (50.3)  | 0.444              |
| Signs                                          |              |              |              |                    |
| Unequal pulse, n (%)                           | 47 (1.2)     | 2 (0.6)      | 45 (1.3)     | 0.585 <sup>k</sup> |
| Heart rate in bpm, M (SD) <sup>f</sup>         |              |              |              |                    |
| Radial pulse palpation                         | 71.5 (11.1)  | 72.1 (11.0)  | 71.5 (11.2)  | 0.363              |
| WatchBP Home A                                 | 72.1 (12.8)  | 72.1 (13.1)  | 72.1 (12.7)  | 0.953              |
| MyDiagnostick                                  | 72.0 (11.6)  | 71.5 (10.5)  | 72.0 (11.7)  | 0.466              |
| Systolic blood pressure <sup>g</sup> , M (SD)  | 143.2 (18.8) | 142.3 (19.7) | 143.3 (18.6) | 0.398              |
| Diastolic blood pressure <sup>g</sup> , M (SD) | 78.7 (9.7)   | 79.0 (9.8)   | 78.7 (9.7)   | 0.671              |
| AF on Holter <sup>h</sup> , n (%)              | 4 (0.1)      | 4 (1.3)      | 0            | 1.000 <sup>i</sup> |

Abbreviations: M (mean), SD (standard deviation), TIA (transient ischemic attack), ECG (electrocardiography), AF (atrial fibrillation), eBPM-AF (electronic blood pressure monitor with AF detection algorithm), hand-ECG (handheld single-lead ECG device with AF detection algorithm).

<sup>a</sup> Index tests were: radial pulse palpation and two devices with AF detection algorithm: an electronic blood pressure monitor (WatchBP Home A) and a handheld ECG device (MyDiagnostick).

<sup>b</sup> Mutually exclusive categories. For every patient, only one answering option could be filled in (exclusive categories). The ethnic origin did not differ significantly between patients with one or more positive tests and patients with three negative tests ( $p=0.495$ ).

<sup>c</sup> Patients in this category were mostly born outside the Netherlands ( $n=76$ ); the four predominant countries of birth were Indonesia ( $n=35$ ), Suriname ( $n=14$ ), Morocco ( $n=8$ ) and Turkey ( $n=5$ ).

<sup>d</sup> For seven patients, history was missing ( $n=3806$ ).

<sup>e</sup> Results were missing in four patients for palpitations ( $n=3809$ ), three for vertigo ( $n=3810$ ), three for syncope ( $n=3810$ ), two for dyspnea ( $n=3811$ ), one for chest tightness ( $n=3812$ ) and 13 for exercise intolerance ( $n=3800$ ).

<sup>f</sup> There were 93 results missing for heart rate on WatchBP Home A ( $n=3720$ ) and 638 for MyDiagnostick ( $n=3175$ ).

<sup>g</sup> If the WatchBP Home A failed, blood pressure was measured manually. Blood pressure was still missing for 53 patients (n=3781).

<sup>h</sup> Holter results were available for 112 patients.

<sup>i</sup> Fisher's exact test.
