# Supplementary material
Source: HighWire-hosted journal article supplement (https://bmjopen.bmj.com/content/12/6/e059172)
Supplement: inline-supplementary-material-3 [file inline-supplementary-material-3.pdf]

### Appendix 3

Diagnostic test results for the three index tests in the complete cases receiving a 12 lead ECG as reference test ( $n=793$ )<sup>a</sup>.

| Index test                    | Index test result            | 12 lead ECG result |       |       |
|-------------------------------|------------------------------|--------------------|-------|-------|
|                               |                              | AF                 | No AF | Total |
| <b>Radial pulse palpation</b> | <i>Irregular</i>             | 20                 | 332   | 352   |
|                               | <i>Regular</i>               | 10                 | 431   | 441   |
|                               | <i>Total</i>                 | 30                 | 763   | 793   |
| <b>WatchBP Home A</b>         | <i>'AFIB'</i>                | 19                 | 124   | 143   |
|                               | <i>No 'AFIB'</i>             | 6                  | 580   | 586   |
|                               | <i>Total<sup>b</sup></i>     | 25                 | 704   | 729   |
| <b>MyDiagnostick</b>          | <i>Red indicator light</i>   | 30                 | 84    | 114   |
|                               | <i>Green indicator light</i> | 0                  | 679   | 679   |
|                               | <i>Total</i>                 | 30                 | 763   | 793   |

Abbreviations: AF (atrial fibrillation).

<sup>a</sup> By protocol, to limit verification bias, we performed the reference test (12 lead ECG) in a 10% random sample of patients with three negative index tests. The complete cases shown here, describe the patients receiving the 12 lead ECG, i.e. the patients with  $\geq 1$  positive index test plus the random sample of patients with three negative index tests.

<sup>b</sup> 64 patients who underwent a 12 lead ECG had no conclusive result on the WatchBP Home A (62 errors and two missing) and had to be imputed. Therefore, the total number of patients is 729 instead of 793.
